# Supplementary material for: Mutations of MAP1B encoding a microtubule-associated phosphoprotein cause sensorineural hearing loss
Source: JCI journal article supplement (doi:10.1172/jci.insight.136046), 2020-12-02
Supplement: sd1 [file 1]

*Supplemental data*

**Mutations of MAP1B encoding the microtubule-associated phosphoprotein cause sensorineural hearing loss**

Limei Cui,<sup>1,2,3</sup> Jing Zheng,<sup>1</sup> Qiong Zhao,<sup>1,2,3</sup> Jia-Rong Chen,<sup>1,2</sup> Hanqing Liu,<sup>2</sup> Guanghua Peng,<sup>4</sup>  
Yue Wu,<sup>1</sup> Chao Chen,<sup>1,2</sup> Qiufen He,<sup>2</sup> Haosong Shi,<sup>5</sup> Shankai Yin,<sup>5</sup> Rick A. Friedman,<sup>6</sup> Ye  
Chen,<sup>1,2,3</sup> and Min-Xin Guan<sup>1,2,3,6,7,8</sup>

The supplemental data included the following information:

1. Supplemental Figure 1, 2, 3, 4, 5, 6, 7, 8 and 9
2. Supplemental Table 1, 2, 3 and 4

NB066

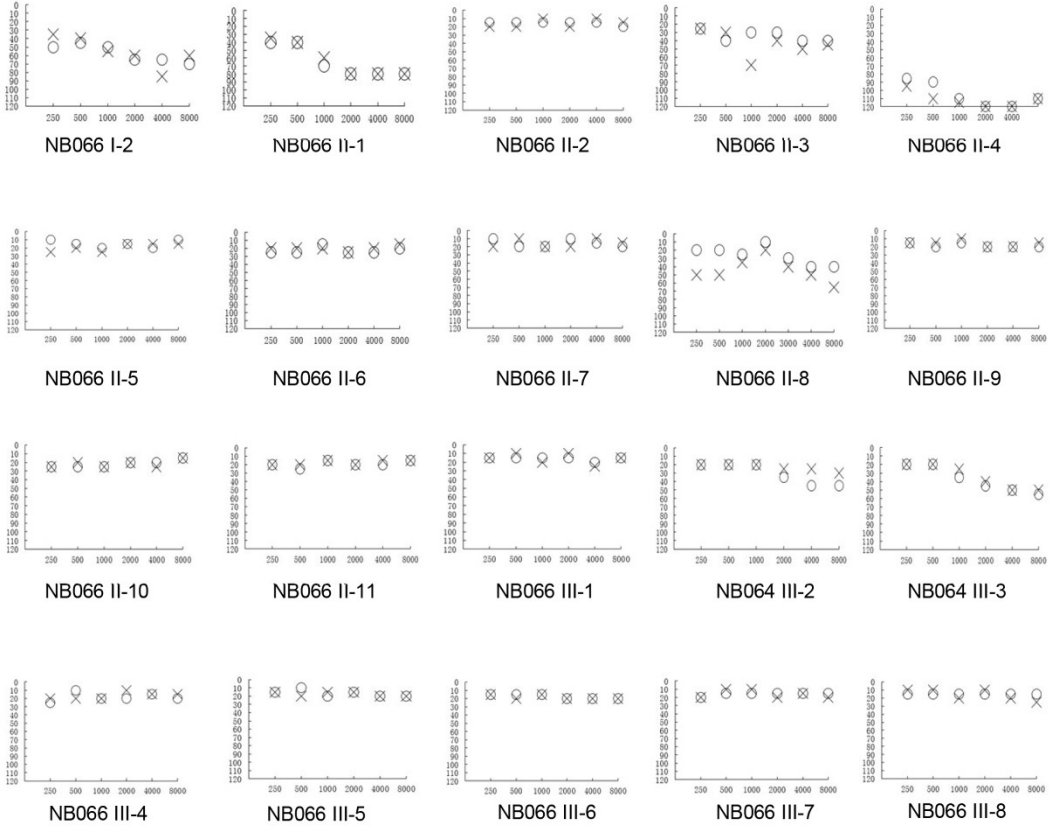

SD061

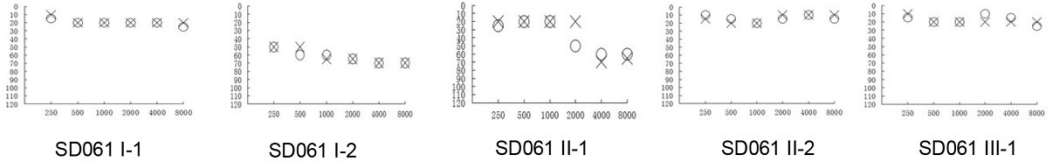

SD234

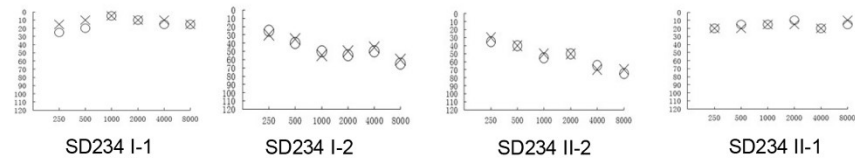

**Supplemental Figure S1.** Air conduction audiograms of the members of three Han Chinese families carrying *MAP1B* mutation(s). Symbols: X-left, O-right ear.

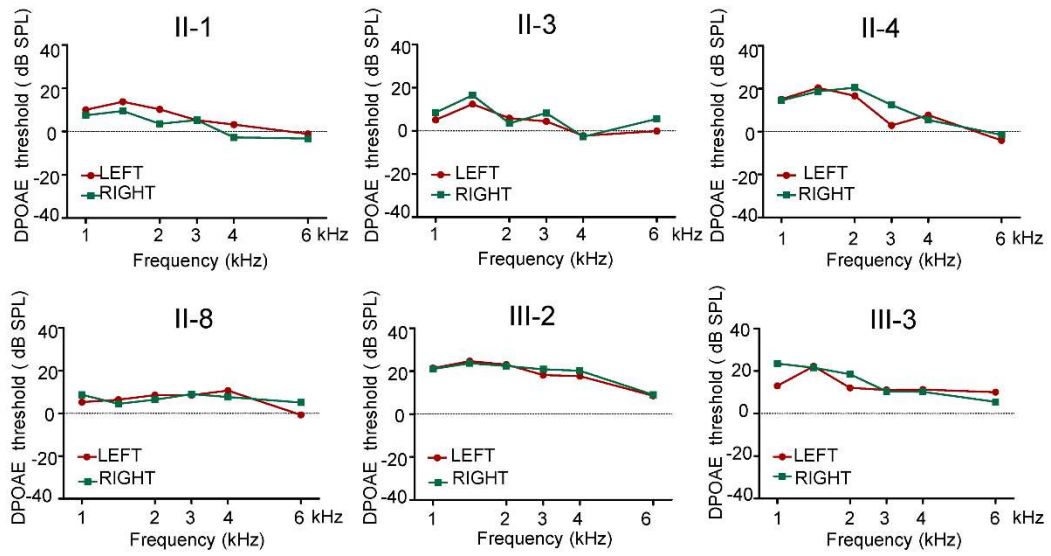

**Supplemental Figure S2.** DPOAE output of 6 members of the NB066 family.

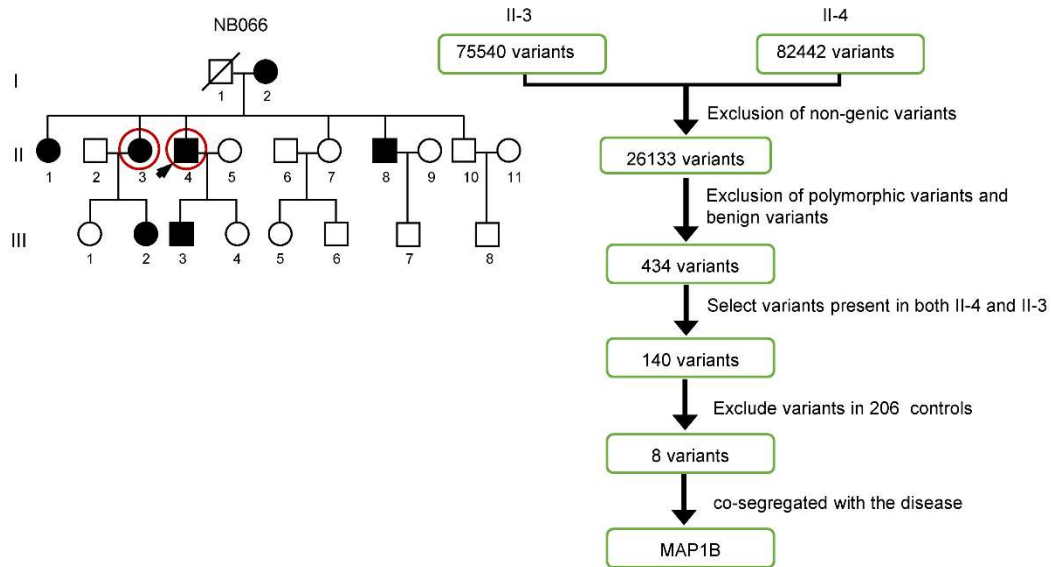

**Supplemental Figure S3. Identification of c.4198A>G (p.1400S>G) mutation in *MAP1B* gene.** (A) Pedigree of the Chinese family (NB066). Hearing-impaired individuals were indicated by blackened symbols. (B) Summary of whole exome sequencing of two patients (NB066 II-3, NB066 II-4). The identified c.4198A>G (p.1400S>G) is located in the exon5 of *MAP1B*.

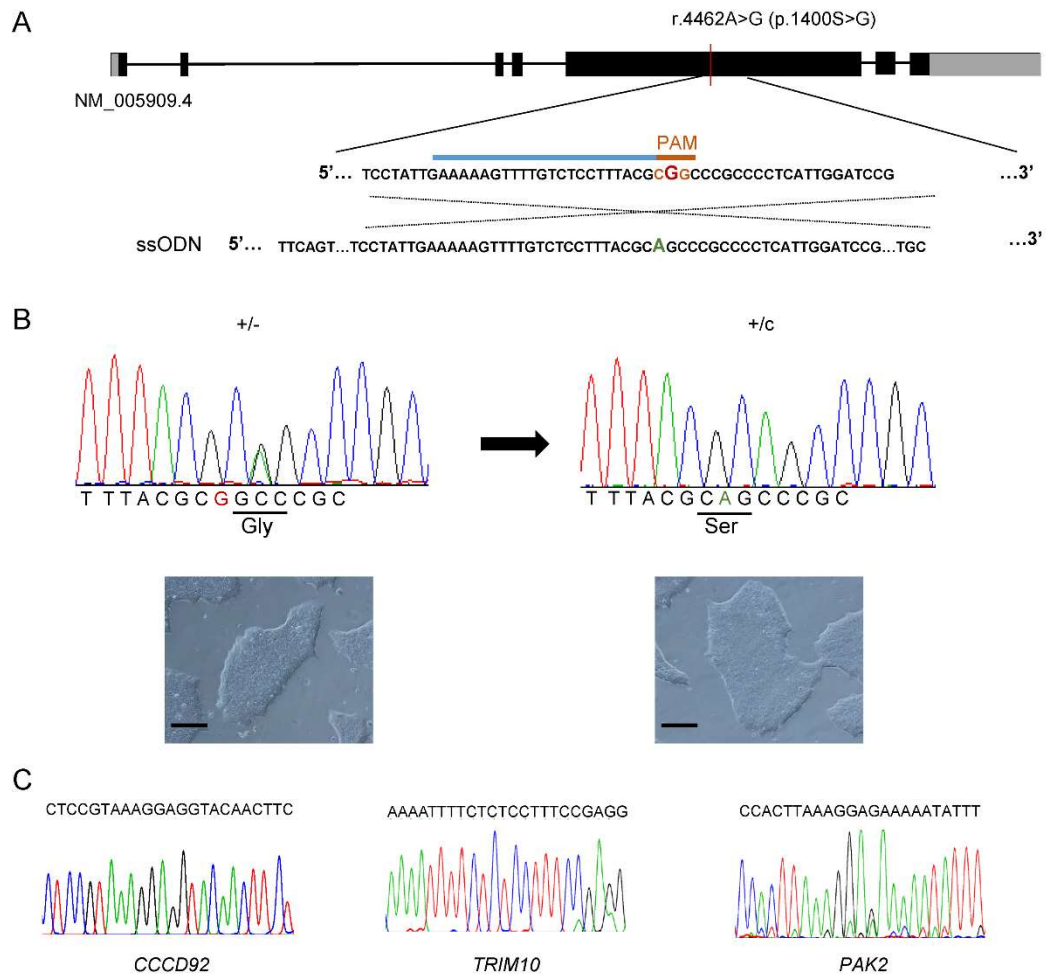

**Supplemental Figure S4. Genetic correction of patient-derived iPSCs.** (A) Schematic of the CRISPR-Cas9 strategy for genomic editing. (B) The positive clones of iPSCs were analyzed by Sanger sequencing to confirm the *MAP1B* mutation correction. Scale bars = 200  $\mu$ m. (C) The top three scored off-target sites were also sequenced, and there was no double peaks adjacent to the off-target sites.

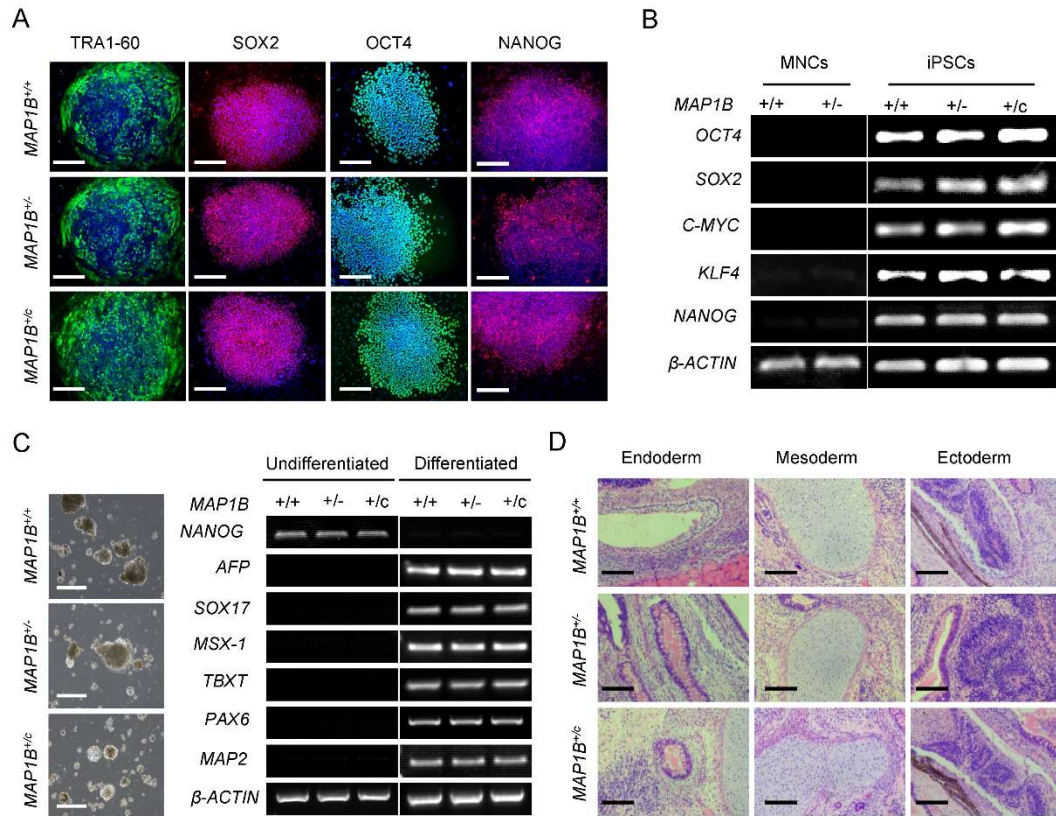

**Supplemental Figure S5. Characterization of iPSCs from three different genotypes.** (A) Confirmation of the differentiability of iPSCs by immunostaining for TRA1-60, SOX2, OCT4, and NANOG. Nuclei were stained with DAPI (blue). Scale bars = 100  $\mu$ m. (B) Expression of iPSC-related markers at passage 4 (*OCT4*, *SOX2*, *c-MYC*, *KLF4*, and *NANOG*). (C) Formation of embryonic bodies at passage 4. Expression of related markers to confirm three germ-layered differentiation: *SOX17*, *AFP*, *SOX17*, *MSX-1*, *TBXT*, *PAX*, and *MAP2*. Scale bars = 400  $\mu$ m. (D) Teratomas formed in NOD-SCID mice were sliced and stained with hematoxylin and eosin. Tissue structure characteristics of the three germ layers were observed (gut epithelium for endoderm, cartilage for mesoderm, as well as neural rosettes and retinal pigment epithelium for ectoderm). Scale bars = 100  $\mu$ m.

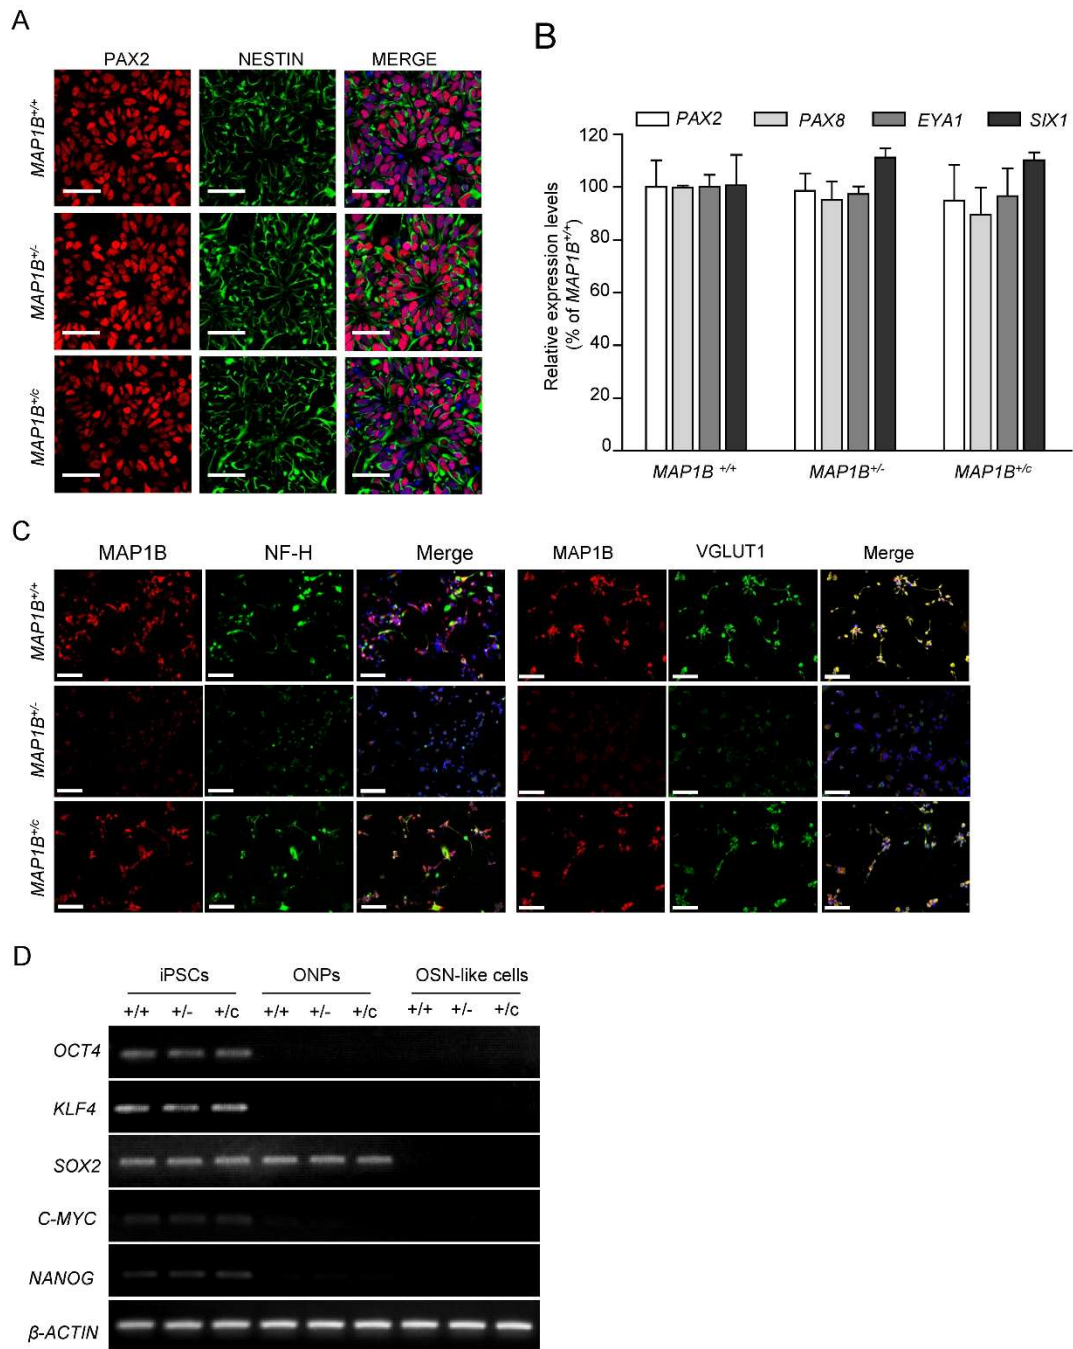

**Supplemental Figure S6. Characterization of differentiated otic neuronal progenitor cells and otic sensory neuron-like cells.** (A) iPSCs were induced toward otic neuronal progenitors and stained for the markers, PAX2+NESTIN. Nuclei were stained with DAPI (blue). Scale bars = 40  $\mu$ m. (B) qRT-PCR analysis of the gene expression of otic neuronal progenitor markers. Marker genes, including *PAX2*, *PAX8*, *EYA1*, and *SIX1*, were detected in all three types of iPSCs induced toward the otic neurons. The relative gene expression were quantified and normalized to  $\beta$ -ACTIN. (C) Generation of otic neurons were confirmed by immunostaining with reported otic neuron marker NF-H and VGLUT1(green). Nuclei were stained with DAPI (blue). Scale bars = 50  $\mu$ m. (D) The down regulation of pluripotency gene markers confirmed that majority of the cells had lost their pluripotency features by day 30 of differentiation.

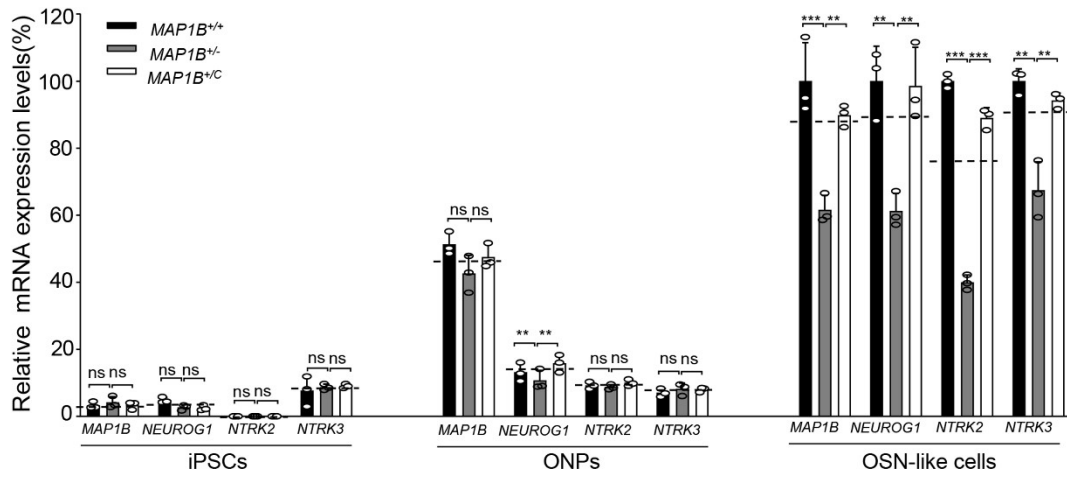

**Supplemental Figure S7.** qRT-PCR analysis of the gene expression of otic neuron markers in iPSCs, ONPs and OSN-like cells. The relative gene expression were quantified and normalized to  $\beta$ -ACTIN. Data are representative of three or more independent experiments. Error bars represent the SEM.



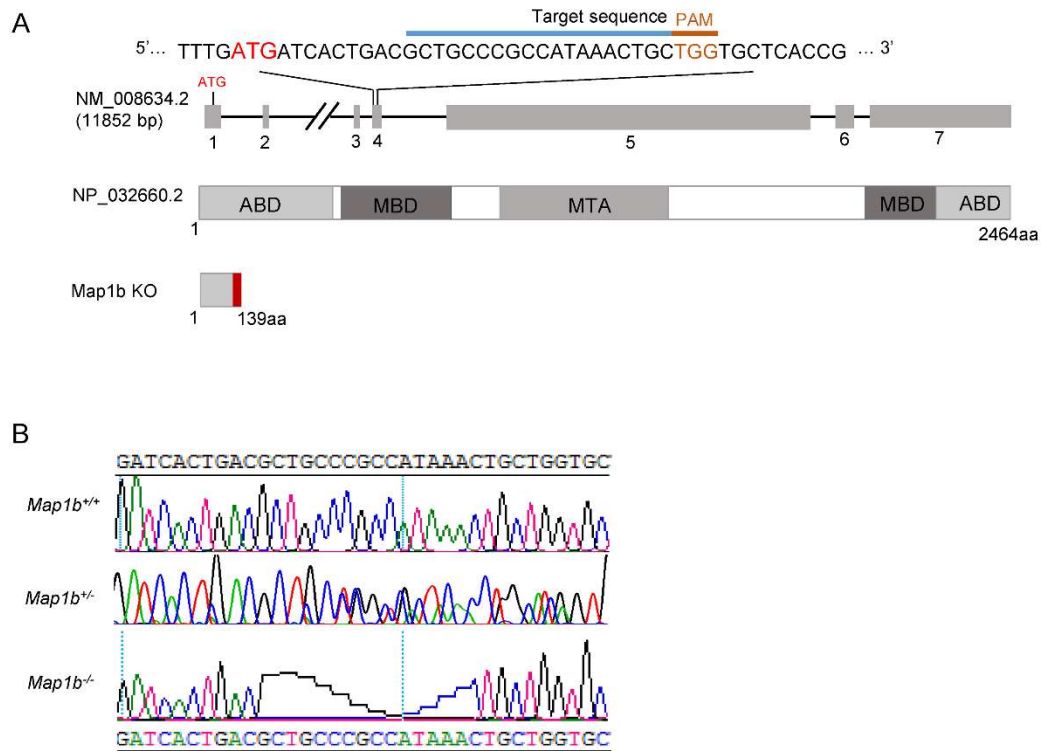

**Supplemental Figure S8. Generation of *Map1b* KO mice using CRISPR/Cas9 technology.**

(A) Schematic diagram illustrating the processing of genetic knockout mice based on CRISPR/Cas9 technology. The gRNA sequence was targeted in exon 4, downstream of the second initiation codon. Frameshift mutation of *Map1b* knockout mice in codon 131 caused a premature stop codon in 139. (B) Partial sequence chromatograms of exon 4 of *Map1b* gene in WT, *Map1b*<sup>+/-</sup> and *Map1b*<sup>-/-</sup> mice revealed a 14bp deletion in *Map1b*.

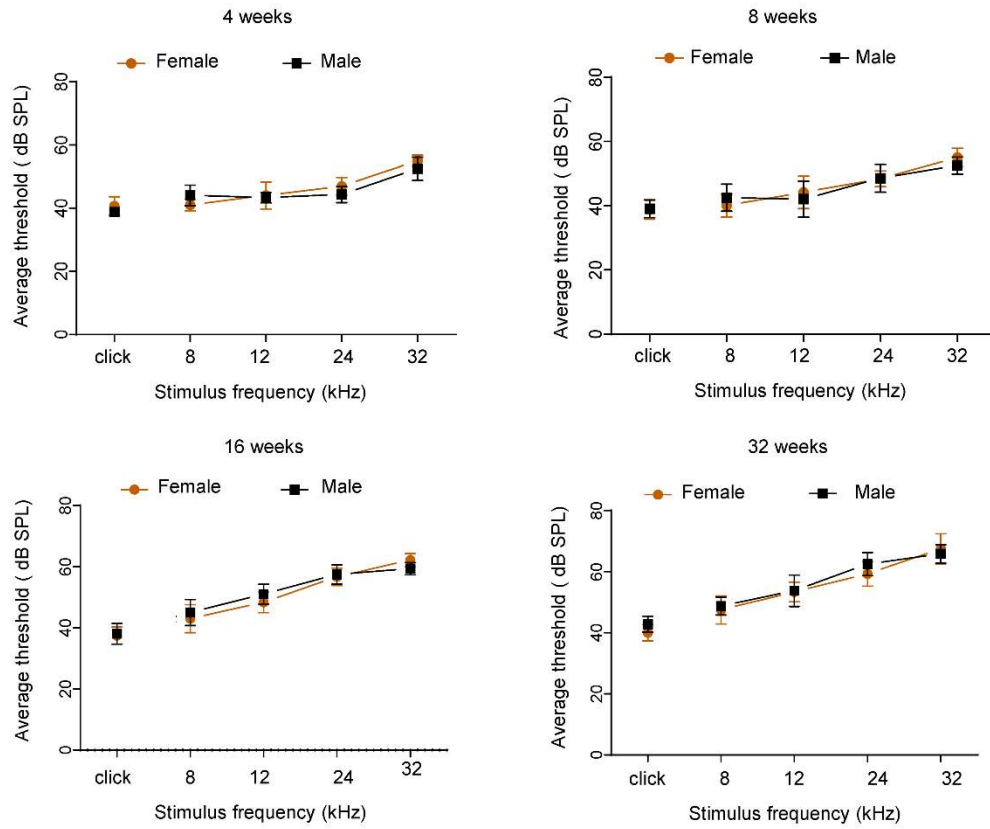

**Supplemental Figure S9.** ABR analysis of male and female *Map1b*<sup>+/-</sup> mice at the age of 4, 8, 16, and 32 weeks. Data are representative of three or more independent experiments. Error bars represent the SEM.

**Supplemental Table S1. Summary of clinical data of members in three Chinese pedigrees**

| Subjects    | Gender | Age at test/onset (years) | PTA(dB) right/left ear | Level of hearing impairment |
|-------------|--------|---------------------------|------------------------|-----------------------------|
| NB066-I-2   | F      | 87/56                     | 58/56                  | Moderate                    |
| NB066-II-1  | F      | 64/25                     | 65/63                  | Moderate                    |
| NB066-II-2  | M      | 66                        | 16/16                  | Normal                      |
| NB066-II-3  | F      | 61/30                     | 34/48                  | Moderate                    |
| NB066-II-4  | M      | 57/15                     | 106/112                | Profound                    |
| NB066-II-5  | F      | 52                        | 15/19                  | Normal                      |
| NB066-II-6  | M      | 55                        | 23/20                  | Normal                      |
| NB066-II-7  | F      | 54                        | 16/15                  | Normal                      |
| NB066-II-8  | M      | 48/23                     | 26/44                  | Moderate                    |
| NB066-II-9  | F      | 45                        | 18/16                  | Normal                      |
| NB066-II-10 | M      | 47                        | 22/22                  | Normal                      |
| NB066-II-11 | F      | 46                        | 19/18                  | Normal                      |
| NB066-III-1 | F      | 40                        | 16/16                  | Normal                      |
| NB066-III-2 | F      | 36/18                     | 31/23                  | Mild                        |
| NB066-III-3 | M      | 35/22                     | 38/34                  | Mild                        |
| NB066-III-4 | F      | 33                        | 18/16                  | Normal                      |
| NB066-III-5 | F      | 32                        | 17/18                  | Normal                      |
| NB066-III-6 | M      | 24                        | 18/19                  | Normal                      |
| NB066-III-7 | M      | 25                        | 16/16                  | Normal                      |
| NB066-III-8 | M      | 28                        | 15/16                  | Normal                      |
| SD061-I-1   | M      | 65                        | 20/20                  | Normal                      |
| SD061-I-2   | F      | 62/20                     | 63/62                  | Moderate                    |
| SD061-II-1  | F      | 40/15                     | 39/36                  | Mild                        |
| SD061-II-2  | M      | 45                        | 14/14                  | Normal                      |
| SD061-III-1 | M      | 20                        | 18/18                  | Normal                      |
| SD234-I-1   | M      | 50                        | 15/11                  | Normal                      |
| SD234-I-2   | F      | 52/25                     | 48/46                  | Mild                        |
| SD234-II-1  | F      | 25                        | 16/17                  | Normal                      |
| SD234-II-2  | M      | 19/16                     | 53/52                  | Moderate                    |

Pure-tone audiometry: PTA; Decibel: dB.

**Supplemental Table S2. Summary of exome sequencing data in two members of NB066 pedigree**

| Categories                                   | II-3      | II-4      |
|----------------------------------------------|-----------|-----------|
| Number of genomic positions for calling SNPs | 134975362 | 135126064 |
| Number of high-confidence genotypes          | 129513273 | 128088826 |
| Number of high confidence genotypes in TR    | 50795761  | 50804878  |
| Total number of SNPs                         | 115027    | 111446    |
| Synonymous –coding                           | 11104     | 11041     |
| Missense                                     | 10979     | 10955     |
| Nonsense                                     | 107       | 113       |
| Read through                                 | 48        | 45        |
| Splice site                                  | 2757      | 2702      |
| Intron                                       | 75966     | 73161     |
| 5' UTR                                       | 3217      | 3099      |
| 3' UTR                                       | 6387      | 6130      |
| Intergenic                                   | 4462      | 4200      |
| Hom                                          | 48487     | 47570     |
| het                                          | 66540     | 63876     |
| Frame error                                  | 0         | 0         |

**Supplemental Table S3. Classification of three variants of *MAP1B* according to the ACMG guidelines.**

|                                             |                  |                                          |                              |                              |
|---------------------------------------------|------------------|------------------------------------------|------------------------------|------------------------------|
| Pos                                         |                  | NC_000005.9:g.71493380A>G                | NC_000005.9:g.71491950T>C    | NC_000005.9:g.71494694T>C    |
| Nucleotide change                           |                  | c.4198A>G                                | c.2768T>C                    | c.5512T>C                    |
| Amino acid change                           |                  | p.1400S>G(Modified residue)              | p.923I>T                     | p.1838F>L                    |
| dpSNP                                       |                  | rs753026898                              | rs143194383                  | rs139319889                  |
| frequency in general/<br>control population | GnomAD_exome_All | G=0.000068 (17/250672)                   | 0.001347 (337/250230)        | 0.001786 (449/251420)        |
|                                             | GnomAD_exome_EAS | G=0.00035(17/49002)                      | 0.00120 (59/48972)           | 0.00247(121/49010)           |
|                                             | ExAC_ALL         | 0.000066 (8/120620)                      | 0.001296 (156/120350)        | 0.001516 (184/121400)        |
|                                             | ExAC_EAS         | 0.00032 (8/25148)                        | 0.00128 (32/25090)           | 0.00270 (68/25166)           |
|                                             | Local            | 0                                        | 0                            | 0                            |
| <i>in silico</i> predictions                | SIFT             | D                                        | T                            | D                            |
|                                             | Polyphen2- HVAR  | B                                        | B                            | B                            |
|                                             | Mutation Taster  | D                                        | P(polymorphism)              | P(polymorphism)              |
|                                             | LRT              | D                                        | N                            | N                            |
|                                             | FATHMM           | T                                        | T                            | T                            |
| ACMG classification                         |                  | Uncertain Significance (PM1+PM2+PP3+PP4) | Uncertain Significance (BP4) | Uncertain Significance (BP4) |

PM1: mutational hot spot and/or critical, well established functional domain

PM2: with extremely low frequency in ExAC/GnomAD

PP3: in silico data support deleterious effect

PP4: phenotype match

BP4: in silico evidence support deleterious effect

**Supplemental Table S4. List of primers used in the present study.**

| <b>Primer names</b>    | <b>Forward sequence (5'-3')</b> | <b>Reverse sequence (5'-3')</b> |
|------------------------|---------------------------------|---------------------------------|
| c.4198A>G mutation     | ACAGCACCTTCGGAGATAATCCT         | CGAGGTGACTGTGATAAAGACGATT       |
| c.2768T>C mutation     | CCTGCCAAAGAAGCTCGAAGC           | TCCATGTCTTCTTCGGCTCG            |
| c.5512T>C mutation     | TATCCGATGTTGCTCCTCCCA           | GTAGCCACTGTCACTTGGAGAT          |
| <i>OCT4</i>            | GACAGGGGGAGGGGAGGAGCTAGG        | CTTCCCTCCAACCAGTTGCCCAAAC       |
| <i>C-MYC</i>           | TGCACTGGAAGTTACAACACCCGA        | TAAGCAGCTGCAAGGAGAGCCTTT        |
| <i>KLF4</i>            | GAGGGAAGACCAGAATTCCCTTGA        | AGAACCAAGACTCACCAAGCACCA        |
| <i>SOX2</i>            | GGGAAATGGGAGGGGTGCAAAAGAGG      | TTGCGTGAGTGTGGATGGGATTGGTG      |
| <i>NANOG</i>           | TTTGTGGGCCTGAAGAAAAGCT          | AGGGCTGTCCTGAATAAGCAG           |
| <i>AFP</i>             | GAATGCTGCAAAGTACCACGCTGGAAC     | TGGCATTCAAGAGGGTTTTTCAGTCTGGA   |
| <i>SOX17</i>           | GGTGTGAATCTCCCCGACAG            | GGGGCAGGTCAAGCTTATGA            |
| <i>TBXT</i>            | GCCCTCTCCCTCCCCTCCACGCACAG      | CGGCGCCGTTGCTCACAGACCACAGG      |
| <i>PAX6</i>            | ATGGGTGAGGGGTGTGTAGT            | ATGGTGAAGCTGGGCATAGGCGGCAG      |
| <i>MSX-1</i>           | CGAGAGGACCCCGTGGATGCAGAG        | GCGCGCCATCTTCAGCTTCTCCAG        |
| <i>MAP2</i>            | CAGGTGGCGGACGTGTGAAAATTGAGAGTG  | CACGCTGGATCTGCCTGGGGACTGTG      |
| <i>PAX2</i>            | CACTTGCGAGCTGACACCTT            | TGCAGATAGACTCGACTTGACTT         |
| <i>PAX8</i>            | AAGTGCAGCAACCATTCAACC           | CTGCTCTGTGAGTCAATGCTTA          |
| <i>SIX1</i>            | GACTCCGGTTTTTCGCCTTTG           | TAGTTTGAGCTCCTGGCGTG            |
| <i>EYA1</i>            | TCAGATGCTATCTGCCGCTG            | GTGCCATTGGGAGTCATGGA            |
| <i>RT-MAP1B</i>        | AAACGTCACCTTCGGTGATGA           | TGGGACACAAACCTGATTGA            |
| <i>NEUROD1</i>         | CTGTCCAGCTTGGAGGACC             | GCCCCAGGGTTATGAGACTA            |
| <i>ISL1</i>            | ACGCATCACGAAGTCGTTT             | CATGCTTTGTTAGGGATGGG            |
| <i>NTRK2</i>           | GAGATGTGATGGAGTGGGCT            | CACTCCAAGTTTGGCATGAA            |
| <i>CCDC92</i>          | GCAGGTGTCTGGAGTCTGTC            | ATCCTACAAATGGGCTGCGT            |
| <i>TRIM10</i>          | GCAGGGGTTTCCTTACGTTCT           | CGGGTACAGAGGTGAGCAAG            |
| <i>PAK2</i>            | TGTTCCAACCTGGGCTTTGT            | TCGATTTGCTATCGGCTGCT            |
| $\beta$ - <i>ACTIN</i> | CATGTACGTTGCTATCCAGGC           | CTCCTTAATGTCACGCACGAT           |
| <i>Mice Map1b</i>      | GGGGACAGCTCGCTCTTACT            | AAAGAGGCCCTCCTACTACC            |
